# Supplementary material for: Elucidation of a masked repeating structure of the O-specific polysaccharide of the halotolerant soil bacteria Azospirillum halopraeferens Au4
Source: publisher site journal article supplement (doi:10.3762/bjoc.12.62), 2016-04-04
Supplement: Additional file 1 [file 1860-5397-12-62-S1.pdf]

## Supporting Information

for

# Elucidation of a masked repeating structure of the O-specific polysaccharide of the halotolerant soil bacteria *Azospirillum halopraeferens* Au4

Elena N. Sigida<sup>\*,§,1</sup>, Yuliya P. Fedonenko<sup>1</sup>, Alexander S. Shashkov<sup>2</sup>, Nikolay P. Arbatsky<sup>2</sup>, Evelina L. Zdrovenko<sup>2</sup>, Svetlana A. Konnova<sup>1,3</sup>, Vladimir V. Ignatov<sup>1</sup> and Yuriy A. Knirel<sup>2</sup>

Address: <sup>1</sup>Institute of Biochemistry and Physiology of Plants and Microorganisms, Russian Academy of Sciences, Prospekt Entuziastov 13, Saratov 410049, Russia, <sup>2</sup>N. D. Zelinsky Institute of Organic Chemistry, Russian Academy of Sciences, Leninsky Prospekt 47, Moscow 119991, Russia and <sup>3</sup>Chernyshevsky Saratov State University, Ulitsa Astrakhanskaya 83, Saratov 410012, Russia

Email: Elena N. Sigida - si\_elena@mail.ru

\*Corresponding author.

§Tel.: +7 8452 970444; Fax: +7 8452 970383.

## <sup>1</sup>H and <sup>13</sup>C NMR spectroscopy data of the O-specific polysaccharide and of the oligosaccharides 1, 2 and 3.

### Content

NMR spectroscopy data of the OPS from *A. halopraeferens* Au4 and of the oligosaccharides obtained after selective cleavages of the OPS.

|                                                                                                         |    |
|---------------------------------------------------------------------------------------------------------|----|
| Scheme S1: Structures of the repeating units of the OPSs from <i>A. halopraeferens</i> Au4.....         | s2 |
| Figure S1: <sup>1</sup> H NMR spectrum of the OPS.....                                                  | s3 |
| Figure S2: <sup>13</sup> C NMR spectrum of the OPS.....                                                 | s4 |
| Figure S3: Fragment of the <sup>1</sup> H, <sup>13</sup> C HMBC spectrum of the OPS.....                | s5 |
| Figure S4: Fragment of the <sup>1</sup> H, <sup>1</sup> H ROESY spectrum of the OPS.....                | s6 |
| Figure S5: <sup>13</sup> C NMR spectrum of the mixture of the oligosaccharides 1 and 2.....             | s7 |
| Figure S6: <sup>1</sup> H NMR spectrum of the mixture of the oligosaccharides 1 and 2.....              | s8 |
| Figure S7: Fragments of the <sup>1</sup> H, <sup>13</sup> C HSQC spectrum of the oligosaccharide 3..... | s9 |

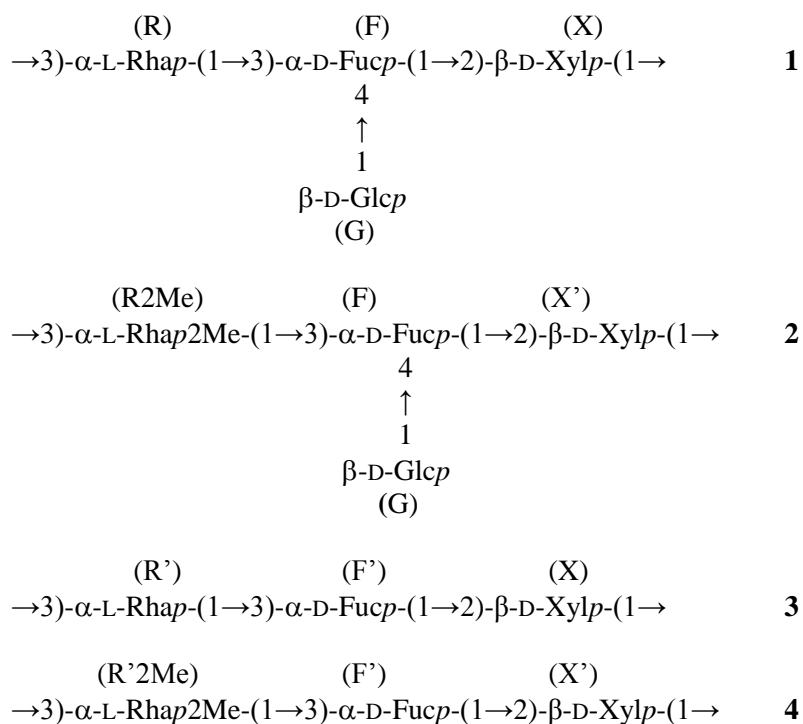

**Scheme S1:** Structures of the repeating units of the OPSs from *A. halopraeferens* Au4.

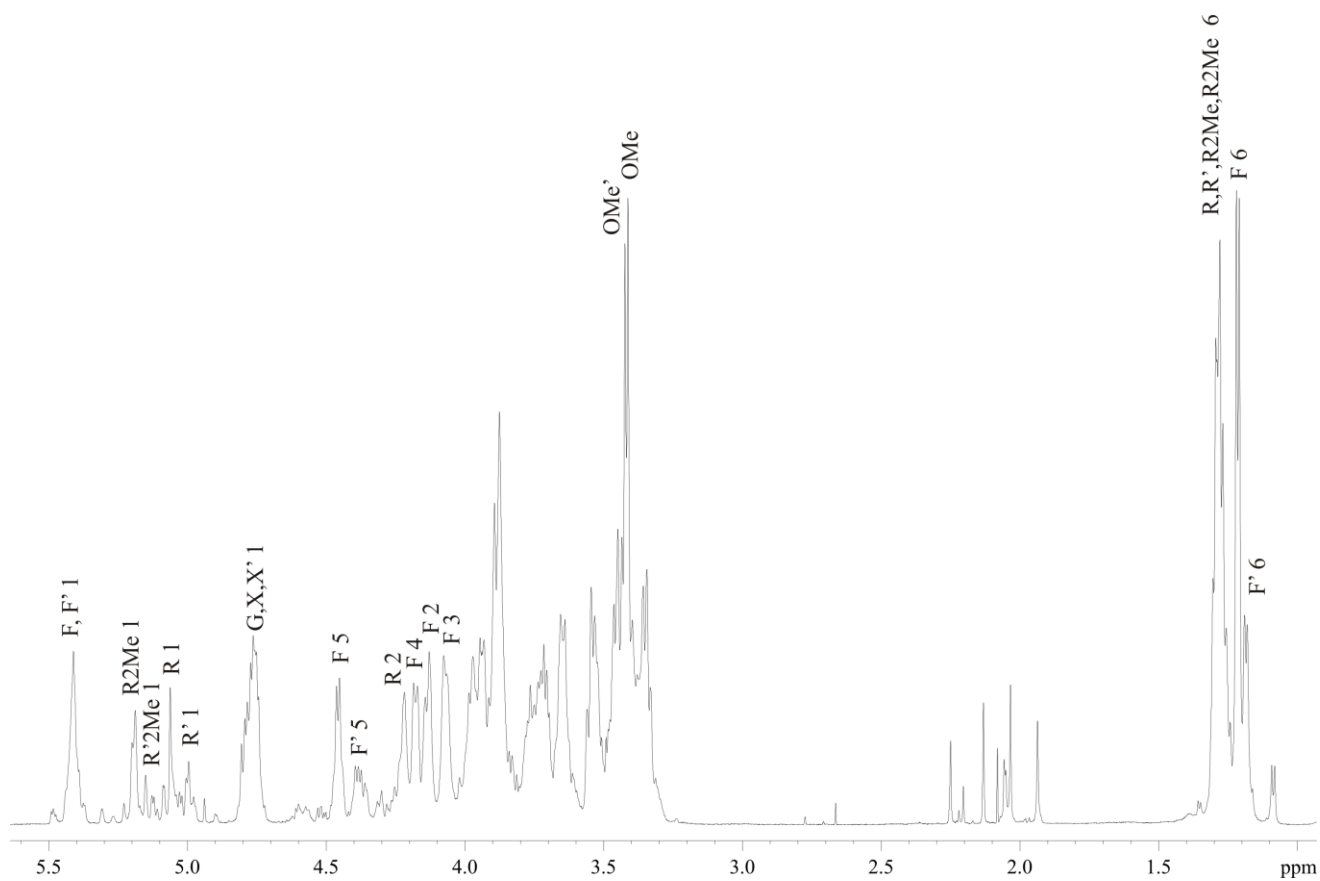

**Figure S1:**  $^1\text{H}$  NMR spectrum of the OPS from *A. halopraeferens* Au4. Arabic numerals refer to protons in sugar residues as denoted in Scheme S1.

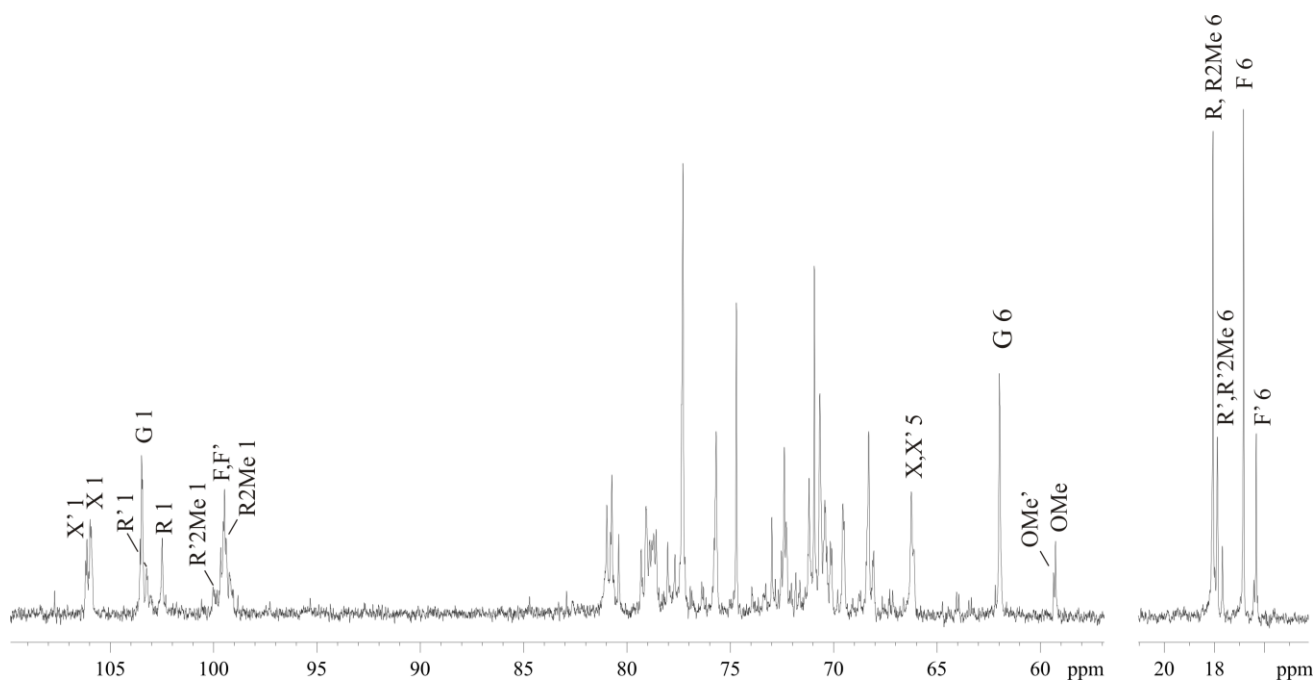

**Figure S2:**  $^{13}\text{C}$  NMR spectrum of the OPS from *A. halopraeferens* Au4. Arabic numerals refer to carbons in sugar residues as denoted in Scheme S1.

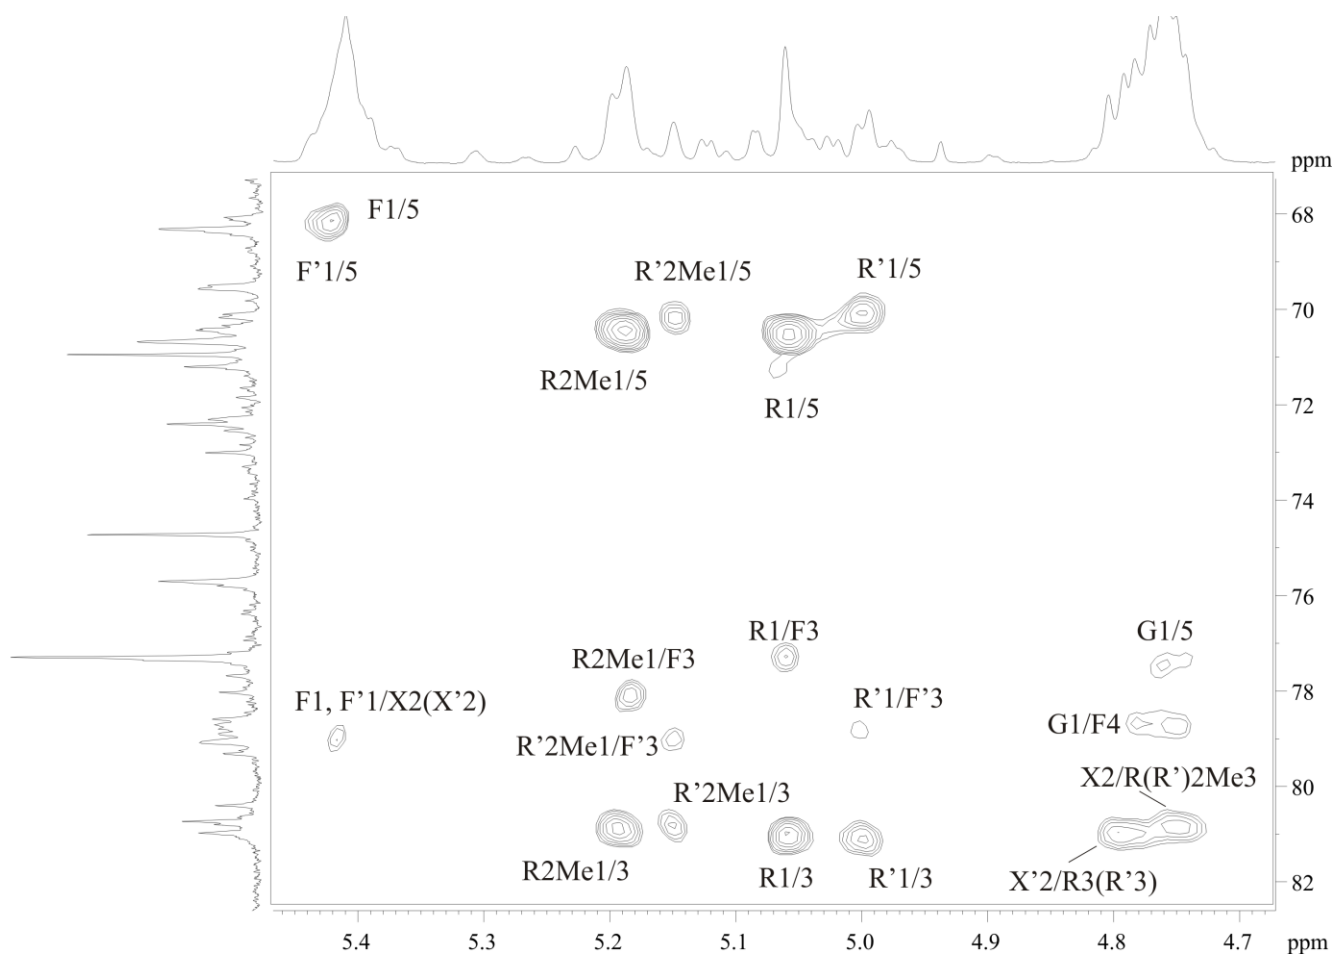

**Figure S3:** Fragment of the  $^1\text{H}$ ,  $^{13}\text{C}$  HMBC spectrum of the OPS from *A. halopraeferens* Au4. Arabic numerals refer to C/H correlations in sugar residues as denoted in Scheme S1.

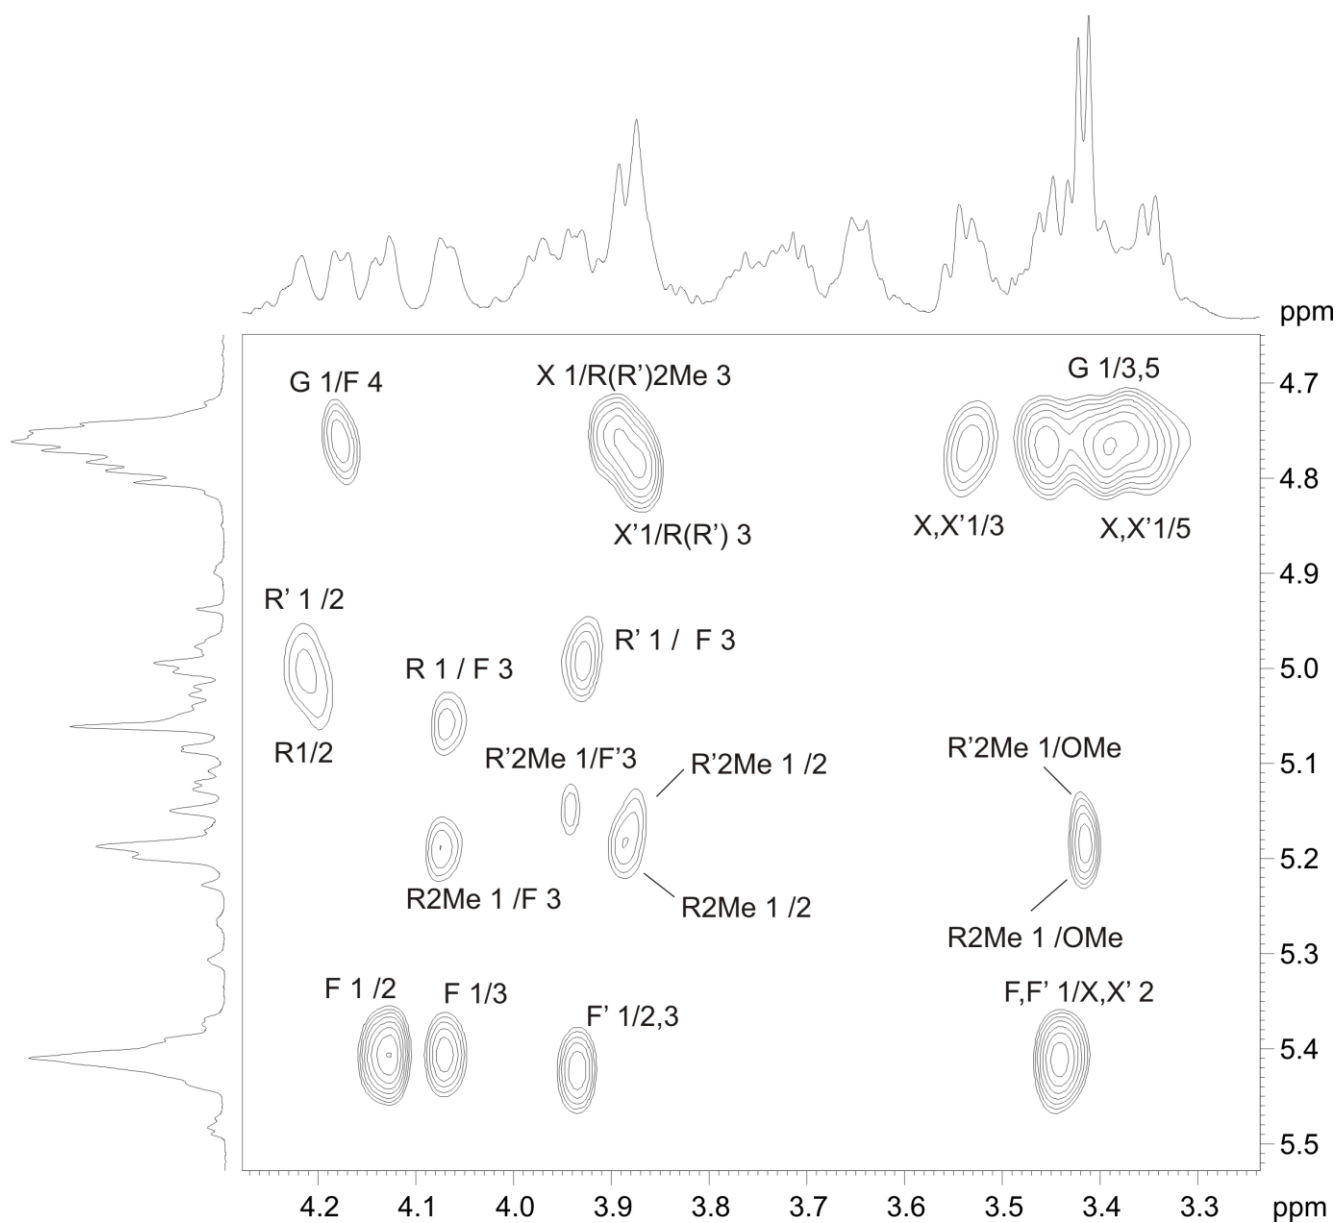

**Figure S4:** Fragment of the  $^1\text{H}$ ,  $^1\text{H}$  ROESY spectrum of the OPS from *A. halopraeferens* Au4. Arabic numerals refer to C/H correlations in sugar residues as denoted in Scheme S1.

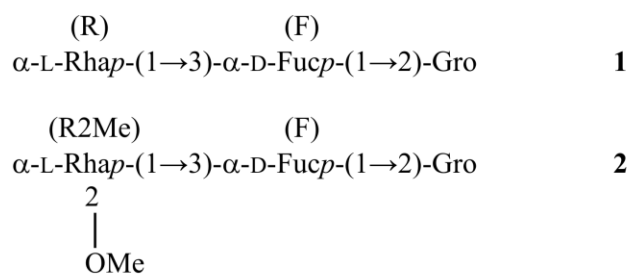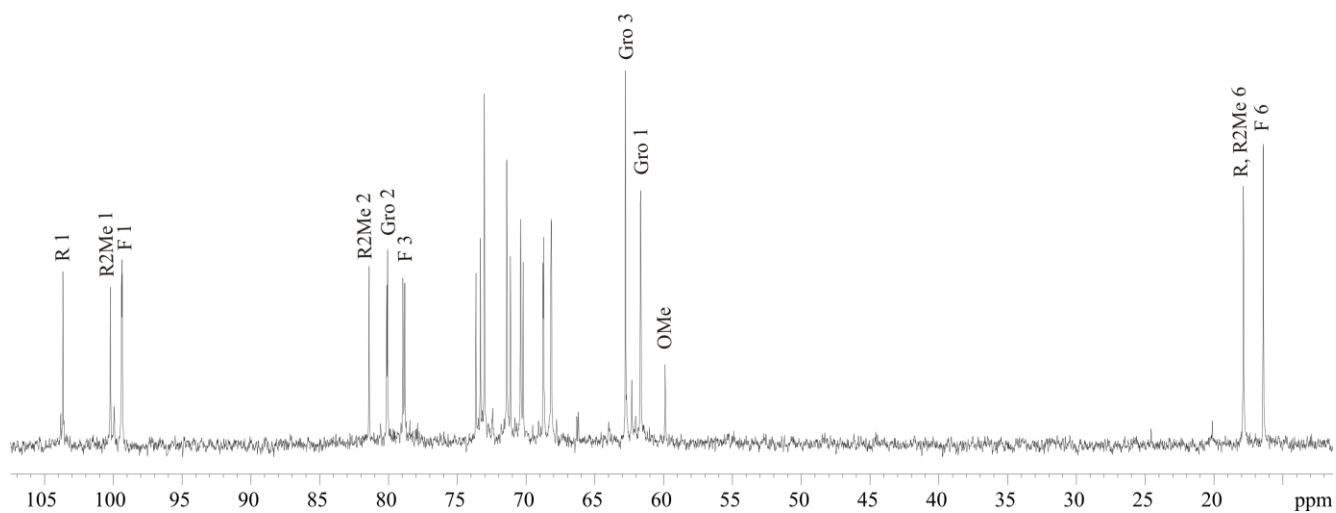

**Figure S5:**  $^{13}\text{C}$  NMR spectrum of the mixture of the oligosaccharides **1** and **2** obtained after Smith degradation of the OPS from *A. halopraeferens* Au4. Arabic numerals refer to carbons in sugar residues as denoted.

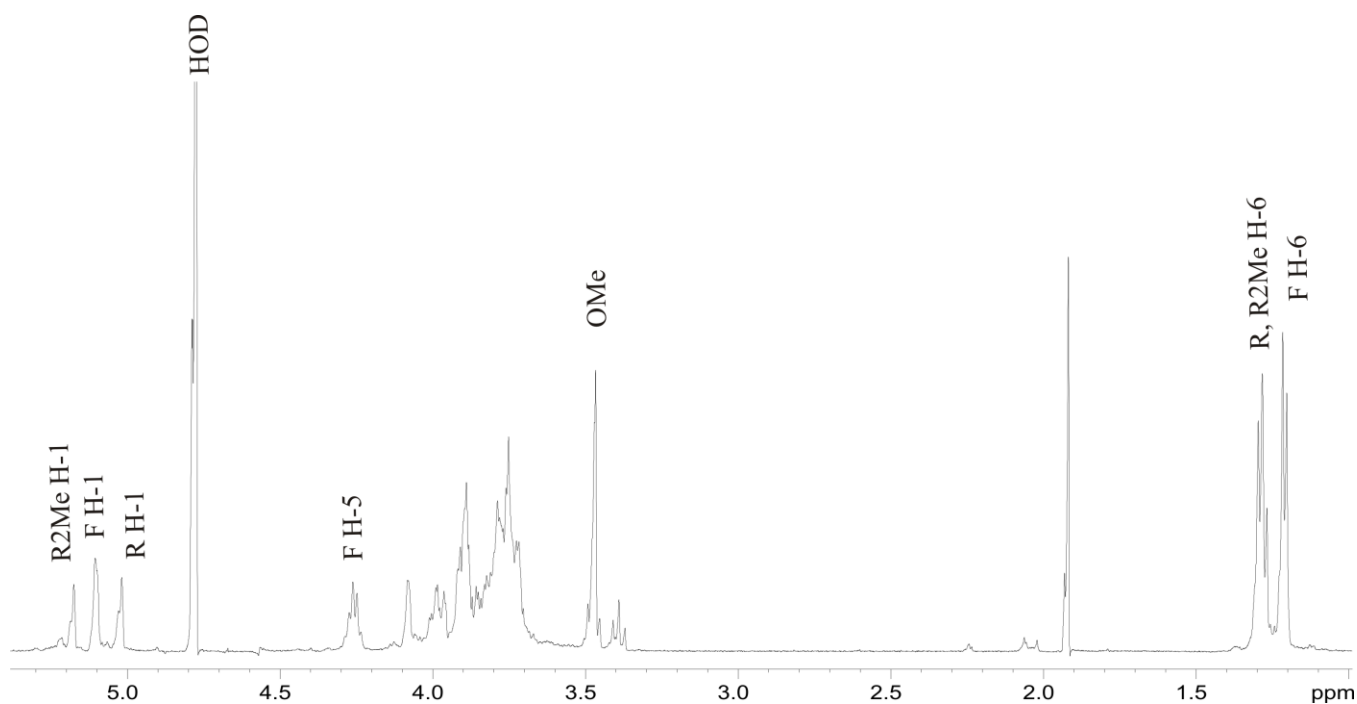

**Figure S6:**  $^1\text{H}$  NMR spectrum of the mixture of the oligosaccharides **1** and **2** obtained after Smith degradation of the OPS from *A. halopraeferens* Au4. Arabic numerals refer to protons in sugar residues as denoted in Figure S5.
